# Supplementary material
Source: PubMed Central journal article supplement (PMC3326405)

## Supporting Information

# Domain Swapping Proceeds via Complete Unfolding: a $^{19}\text{F}$ -NMR Study of the Cyanovirin-N Protein

Lin Liu,<sup>†,‡</sup> In-Ja L. Byeon,<sup>†</sup> Ivet Bahar,<sup>‡</sup> Angela M. Gronenborn<sup>\*,†</sup>

<sup>†</sup>*Department of Structural Biology, University of Pittsburgh School of Medicine, 1051 Biomedical Science Tower 3, 3501 Fifth Avenue, Pittsburgh, Pennsylvania 15261, United States*

<sup>‡</sup>*Department of Computational and Systems Biology, University of Pittsburgh School of Medicine, 3076 Biomedical Science Tower 3, 3501 Fifth Avenue, Pittsburgh, Pennsylvania 15261, United States*

Email: amg100@pitt.edu

**Figure S1.** Linewidths of 5- $^{19}\text{F}$ -tryptophan resonances as a function of temperature. Results are presented for free tryptophan (squares), that in CV-N<sup>P51G</sup> monomer (triangles), and in the CV-N<sup>P51G</sup> domain-swapped dimer (diamonds).

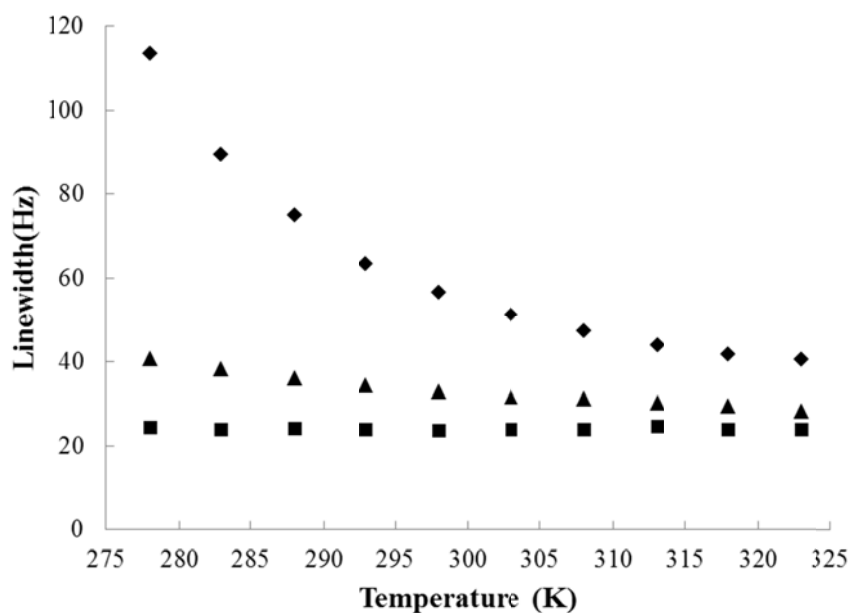

Supplement: NIHMS359434-supplement-1_si_001.pdf [file NIHMS359434-supplement-1_si_001.pdf]
